# Supplementary material for: Kinetic effects in predicting adsorption using the GCMC method – using CO2 adsorption on ZIFs as an example
Source: Royal Society of Chemistry journal article supplement (doi:10.1039/c4ra03768e), 2014-01-01

## Supporting Information

# Kinetic Effects in Predicting Adsorptions Using GCMC Method – Using CO<sub>2</sub> Adsorption on ZIFs as an Example

*Fenglei Cao, Yingxin Sun<sup>†</sup>, Lin Wang<sup>‡</sup> and Huai Sun<sup>\*</sup>*

School of Chemistry and Chemical Engineering and Ministry of Education, Key  
Laboratory of Scientific and Engineering Computing, Shanghai Jiao Tong University,  
Shanghai 200240, China

E-mail: [huaisun@sjtu.edu.cn](mailto:huaisun@sjtu.edu.cn)

---

Present Address:

<sup>†</sup> School of Chemical and Environmental Engineering, Shanghai Institute of Technology,  
Shanghai 200240, China

<sup>‡</sup> Elements Strategy Initiative for Catalysts and Batteries (ESICB), Kyoto University,  
Kyoto 615-8520, Japan

**Table S1.** Chemical potential (K) of CO<sub>2</sub> calculated at different pressures and 298K

| Pressure (kPa) | Chemical Potential (K) |
|----------------|------------------------|
| 0.01           | -7592.297              |
| 0.05           | -7112.890              |
| 0.1            | -6906.055              |
| 0.5            | -6426.704              |
| 1              | -6220.019              |
| 5              | -5740.344              |
| 10             | -5533.726              |
| 20             | -5327.698              |
| 30             | -5206.790              |
| 40             | -5121.303              |
| 50             | -5055.190              |
| 60             | -5000.872              |
| 70             | -4954.931              |
| 80             | -4915.098              |
| 90             | -4880.221              |
| 100            | -4849.459              |
| 120            | -4794.889              |
| 150            | -4728.988              |
| 200            | -4644.168              |
| 500            | -4374.358              |
| 1000           | -4175.098              |
| 2000           | -3981.250              |
| 2500           | -3921.657              |
| 3000           | -3875.054              |

**Table S2.** MSM force field parameters for CO<sub>2</sub>.

|                   | R <sup>0</sup> (Å) | ε (kJ/mol) | q(e)  |
|-------------------|--------------------|------------|-------|
| C_CO <sub>2</sub> | 3.13               | 0.2467     | 0.576 |
| O_CO <sub>2</sub> | 3.38               | 0.6903     | 0.288 |

**Figure S1.** The models using MD simulation to investigate desorption behaviors (a) and adsorption behaviors (b).

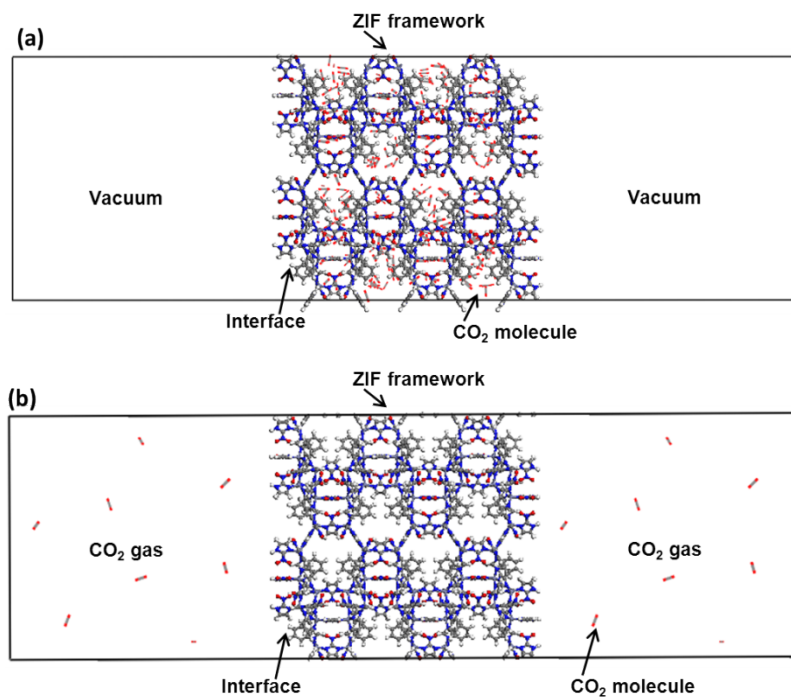

**Figure S2.** Comparison of energy differences between the FF and ab initio results of all data.

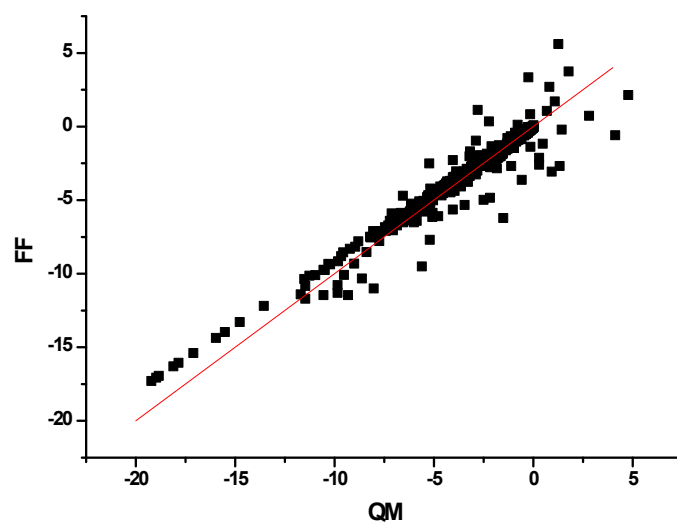

Supplement: c4ra03768e1.pdf [file c4ra03768e1.pdf]
